# Supplementary material
Source: PubMed Central journal article supplement (PMC2229877)

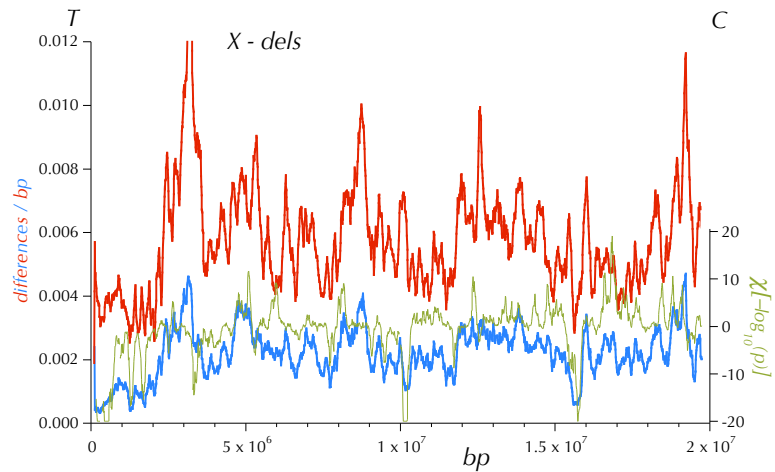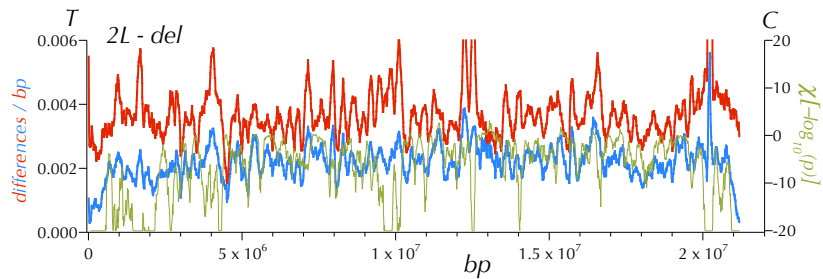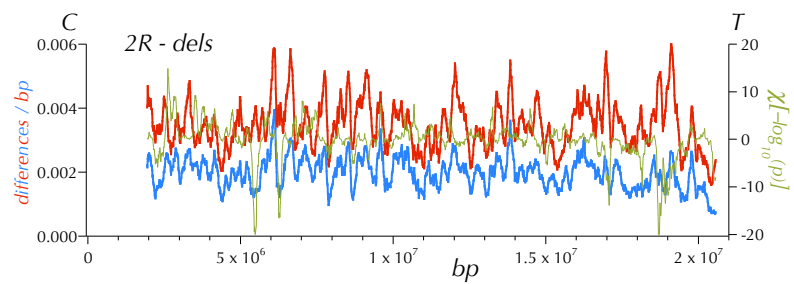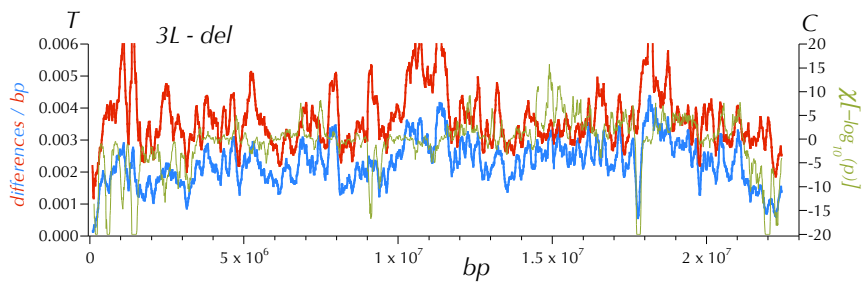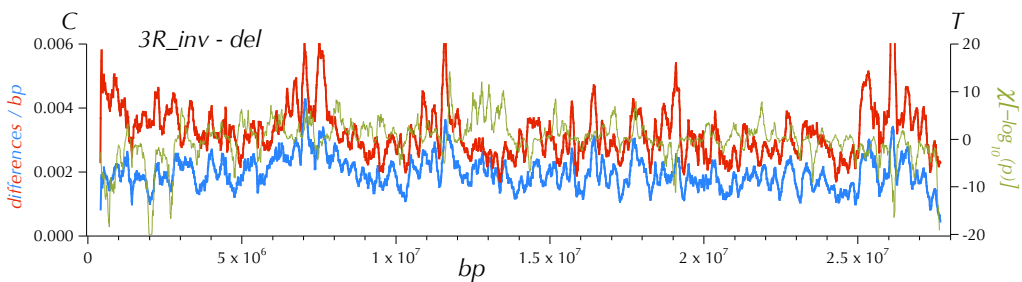

Supplement: pbio.0050310.sg001.pdf [file pbio.0050310.sg001.pdf]

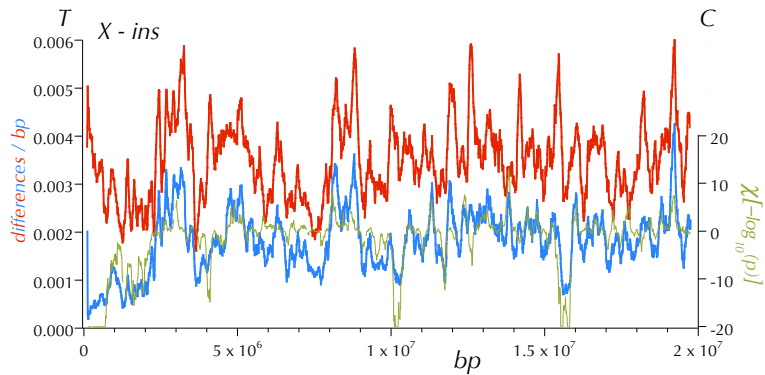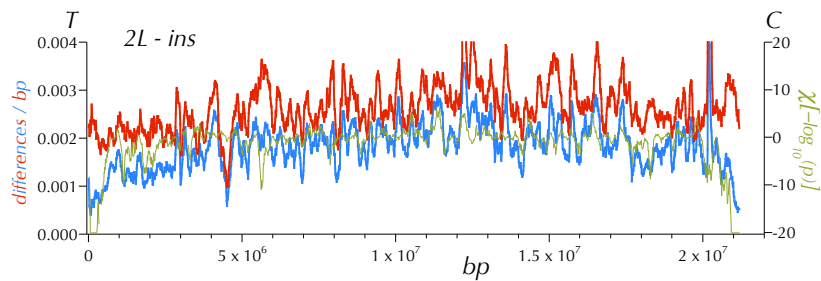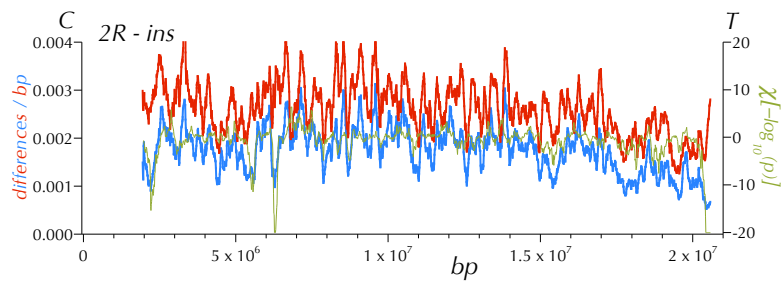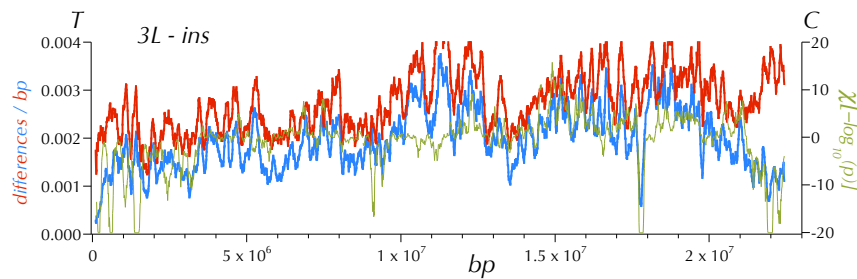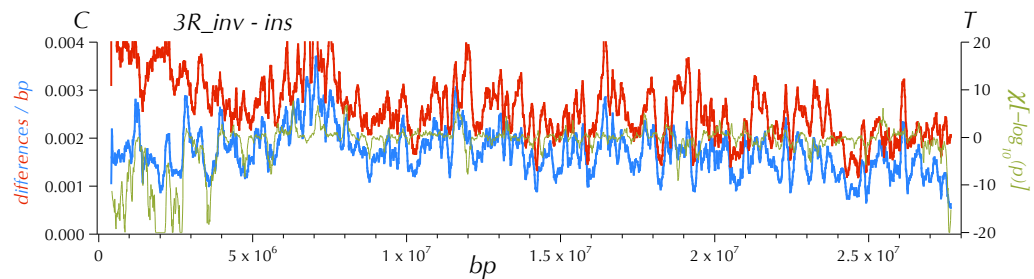

Supplement: pbio.0050310.sg002.pdf [file pbio.0050310.sg002.pdf]

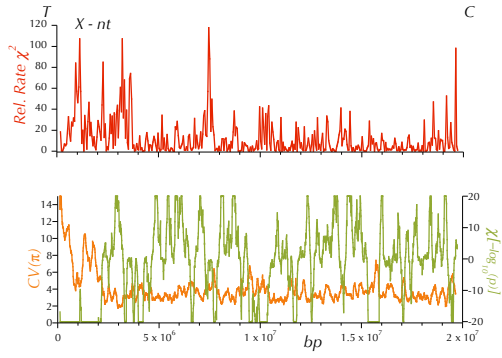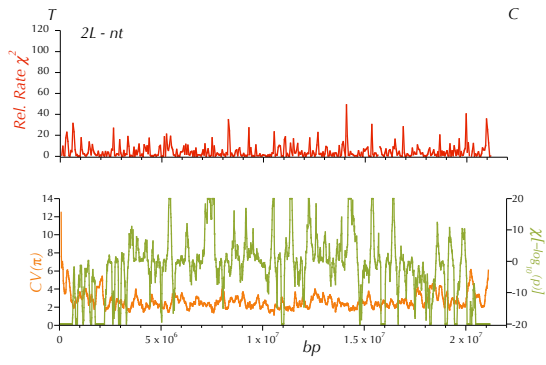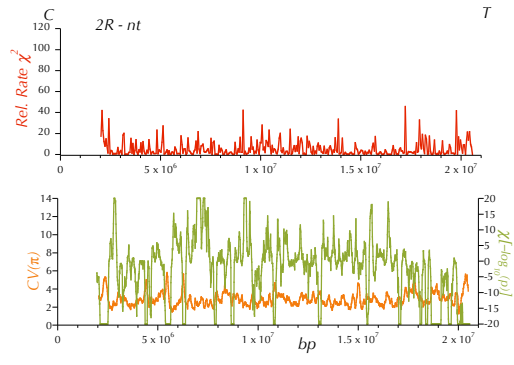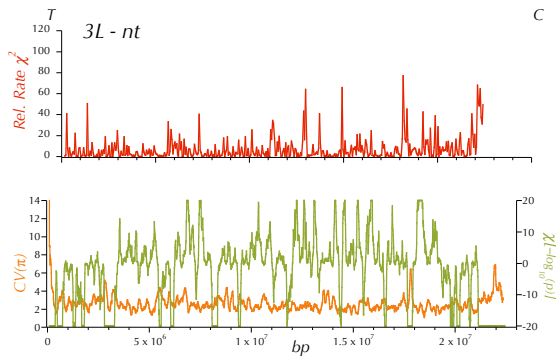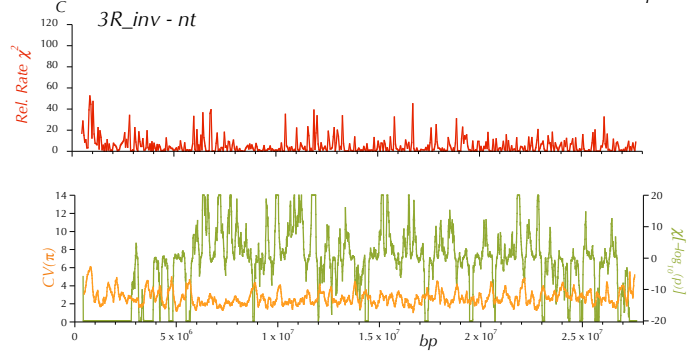

Supplement: pbio.0050310.sg003.pdf [file pbio.0050310.sg003.pdf]

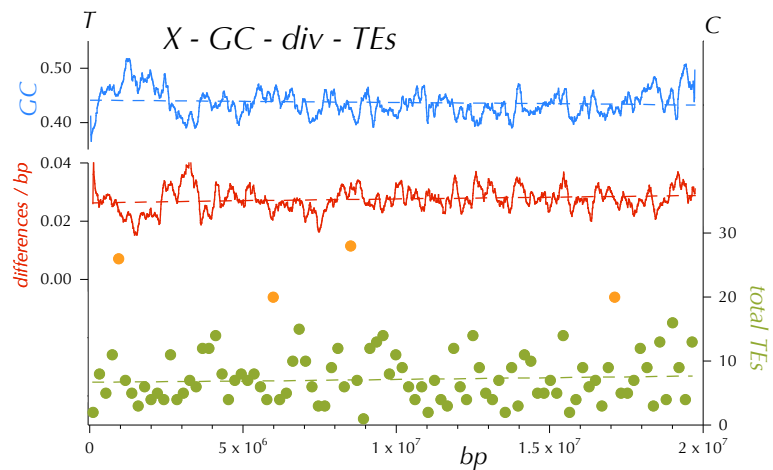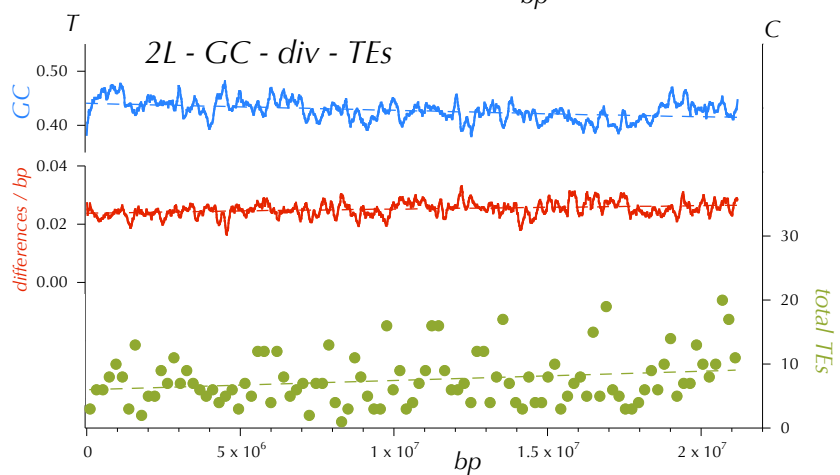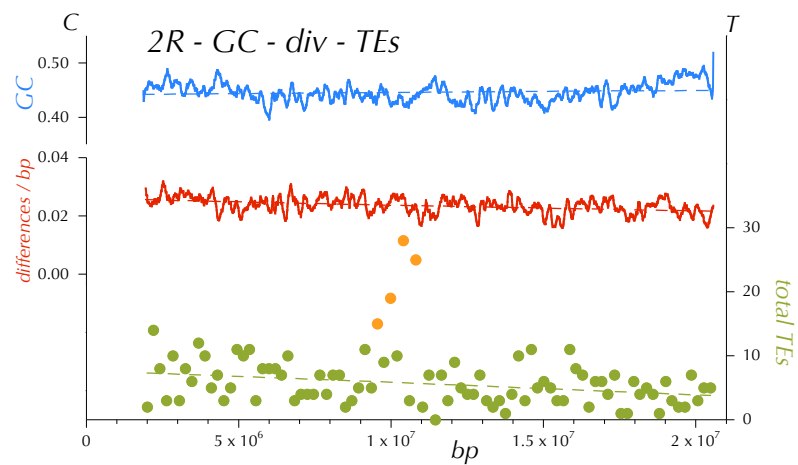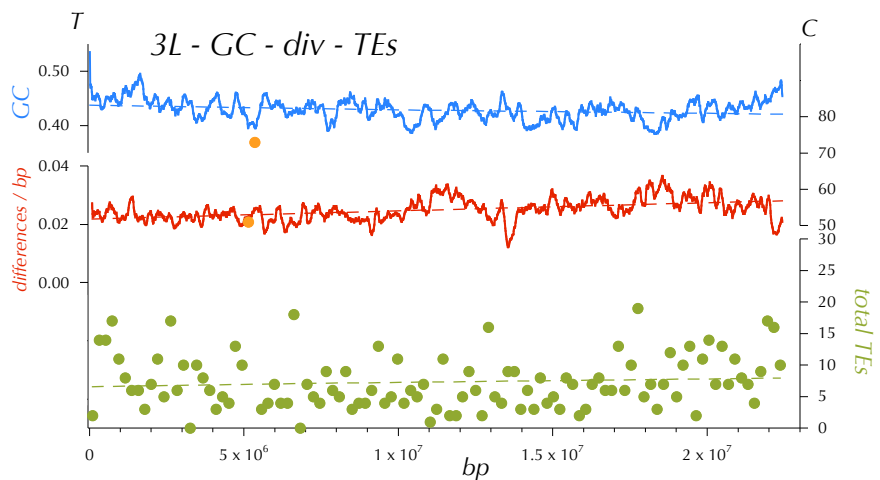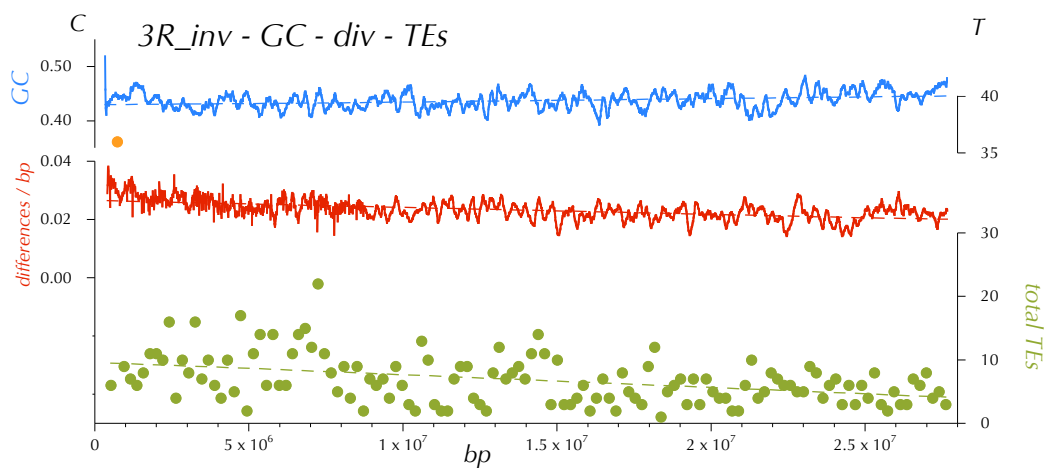

Supplement: pbio.0050310.sg004.pdf [file pbio.0050310.sg004.pdf]

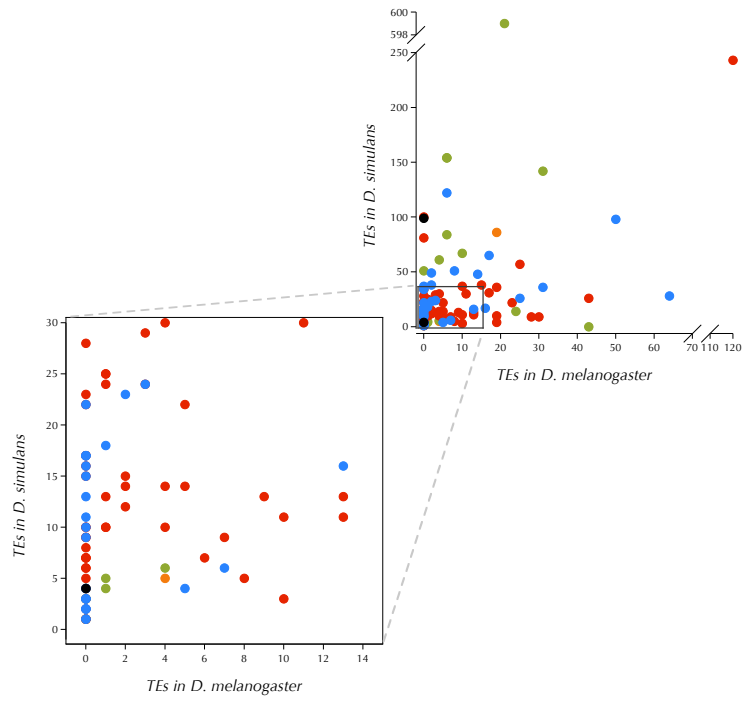

Supplement: pbio.0050310.sg005.pdf [file pbio.0050310.sg005.pdf]
